# Supplementary material for: Tobacco mosaic virus for the targeted delivery of drugs to cells expressing prostate-specific membrane antigen
Source: Royal Society of Chemistry journal article supplement (doi:10.1039/d1ra03166j), 2021-01-01
Supplement: d1ra03166j1.pdf [file d1ra03166j1.pdf]

## Supplementary Material for

### **Tobacco mosaic virus for the targeted delivery of drugs to cells expressing prostate-specific membrane antigen**

Sourabh Shukla<sup>1#</sup>, Isaac Marks<sup>1#</sup>, Derek Church<sup>1</sup>, Soo-Khim Chan<sup>1</sup>, Jonathan K. Pokorski<sup>1,5,6</sup>,  
Nicole F. Steinmetz<sup>1,2,3,4,5,6\*</sup>

<sup>1</sup>Department of NanoEngineering, <sup>2</sup>Bioengineering, <sup>3</sup>Radiology, <sup>4</sup>Moore's Cancer Center, <sup>5</sup>Center for Nano-ImmunoEngineering, <sup>6</sup>Institute for Materials Discovery and Design, University of California, San Diego, La Jolla, CA 92093 USA.

#these authors contributed equally

\*corresponding author: [nsteinmetz@ucsd.edu](mailto:nsteinmetz@ucsd.edu)

**Figure S1**

**A**

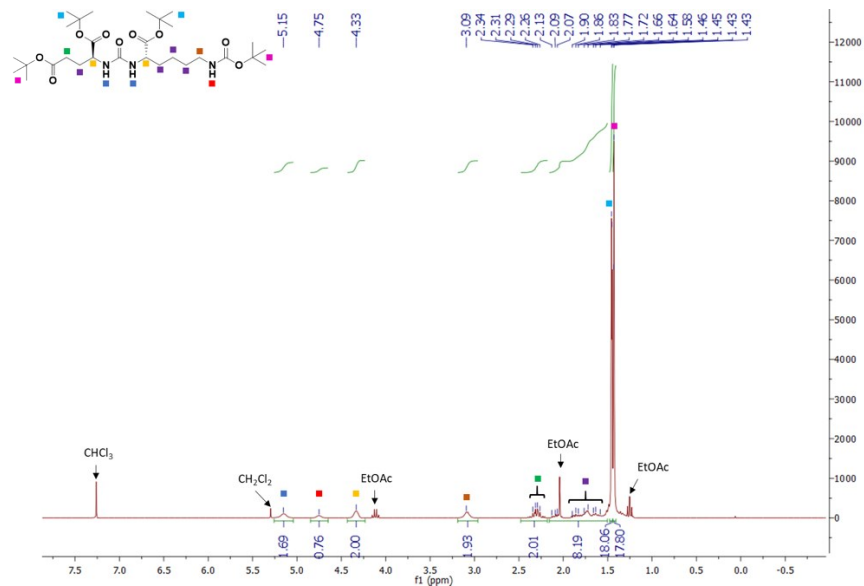

**B**

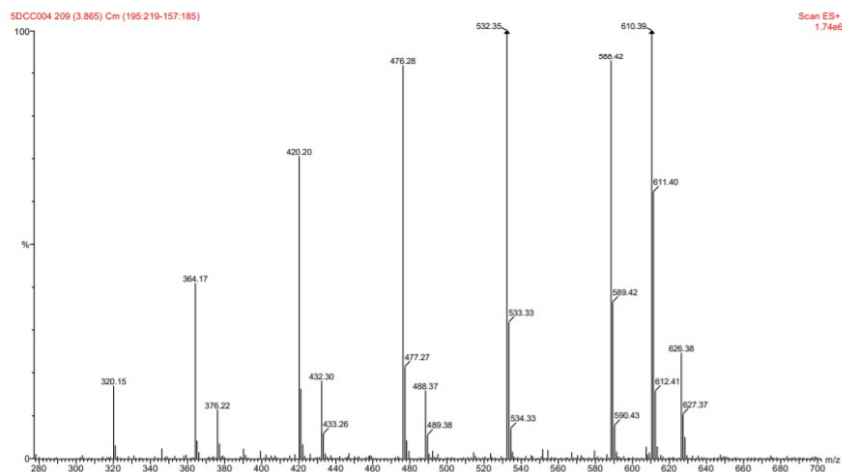

**Figure S1.** Analysis of compound (**1**) by (**A**)  $^1\text{H-NMR}$  in  $\text{CDCl}_3$  and (**B**) ESI-MS. The peak at 5.3 ppm represents residual  $\text{CH}_2\text{Cl}_2$  and the peaks at 4.12, 2.06 and 1.3 ppm represent residual ethyl acetate. Theoretical mass  $[\text{M}]$  calculated for  $\text{C}_{29}\text{H}_{53}\text{N}_3\text{O}_9$  was 587.38; protonated experimental mass found was  $[\text{M}+\text{H}]^+$  588.42.

## Figure S2

A

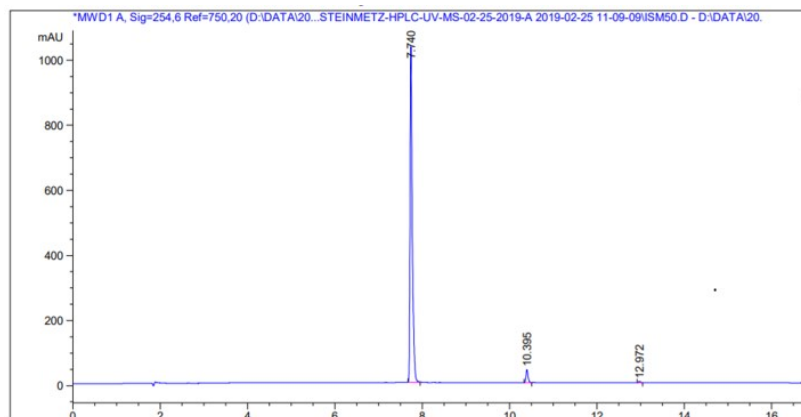

B

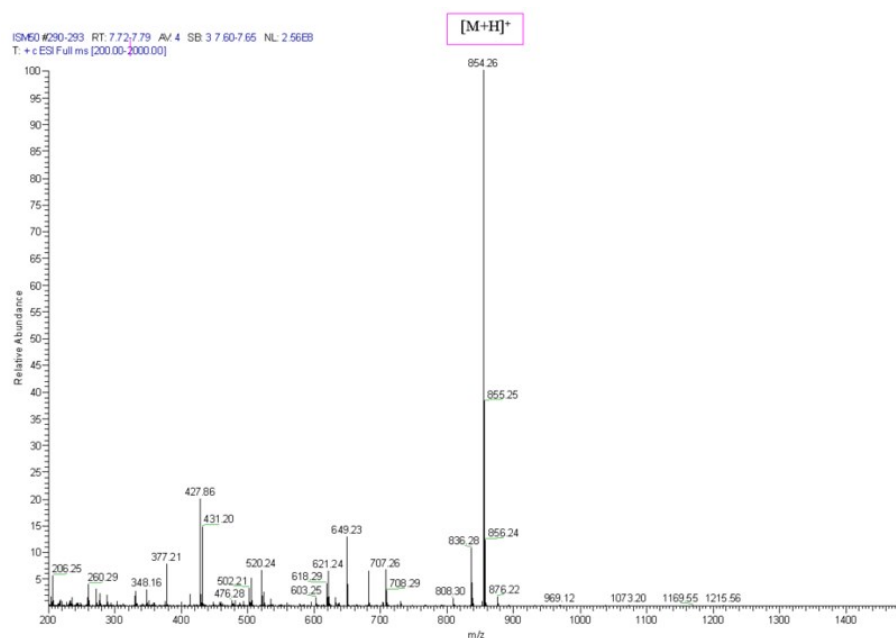

**Figure S2.** Analysis of compound (**3**) = DUPA-PEG<sub>4</sub>-DBCO by (A) reversed-phase HPLC and (B) ESI-MS. Theoretical mass [M] calculated for C<sub>42</sub>H<sub>55</sub>N<sub>5</sub>O<sub>14</sub> was 853.37; protonated experimental mass found was [M+H]<sup>+</sup> 854.26.
